# Supplementary material for: Future climate and surface mass balance of Svalbard glaciers in an RCP8.5 climate scenario: a study with the regional climate model MAR forced by MIROC5
Source: Copernicus journal article supplement (doi:10.5194/tc-9-945-2015), 2015-05-07
Supplement: Supplementary file [file tc-9-945-2015-supplement.pdf]

Supplement of The Cryosphere, 9, 945–956, 2015  
<http://www.the-cryosphere.net/9/945/2015/>  
doi:10.5194/tc-9-945-2015-supplement  
© Author(s) 2015. CC Attribution 3.0 License.

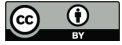

*Supplement of*

**Future climate and surface mass balance of Svalbard glaciers in an RCP8.5 climate scenario: a study with the regional climate model MAR forced by MIROC5**

**C. Lang et al.**

*Correspondence to:* C. Lang ([charlotte.lang@ulg.ac.be](mailto:charlotte.lang@ulg.ac.be))

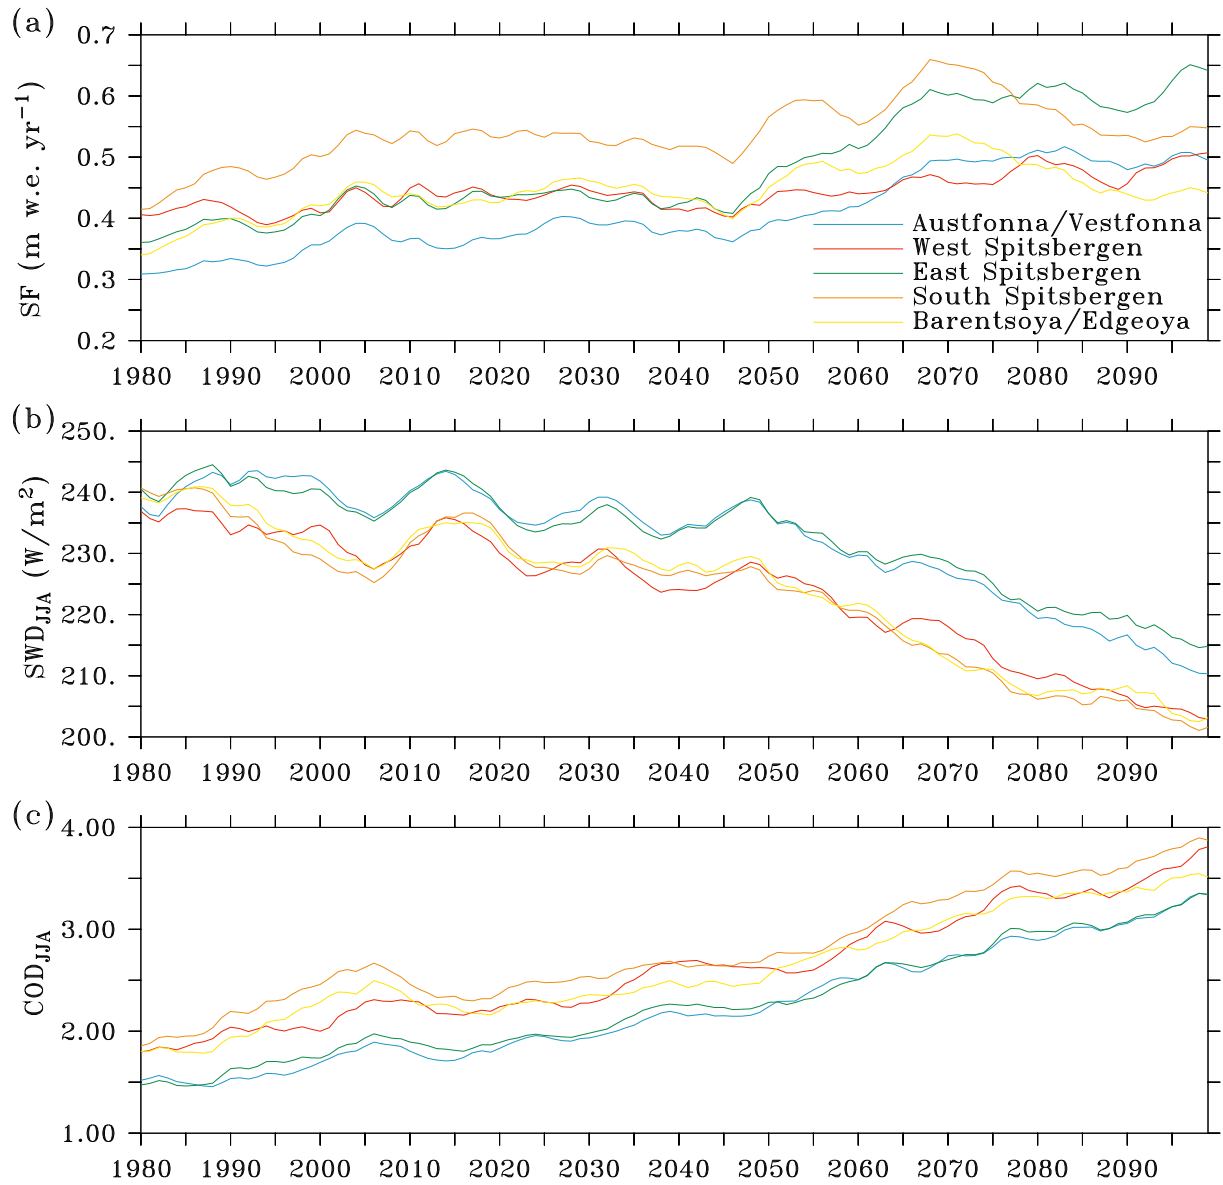

**Fig. S1:** (a) Snowfall (SF, m w.e. yr<sup>-1</sup>) 10-year running mean for the 5 different regions shown in Fig. 3 as simulated by MAR forced by the MIROC5 based historical scenario over 1980 - 2005 and RCP8.5 afterwards. (b) Same as (a) but for the JJA incoming solar radiation at the surface (SWD<sub>JJA</sub>, W m<sup>-2</sup>). (c) Same as (a) but for the cloud optical depth (COD<sub>JJA</sub>).

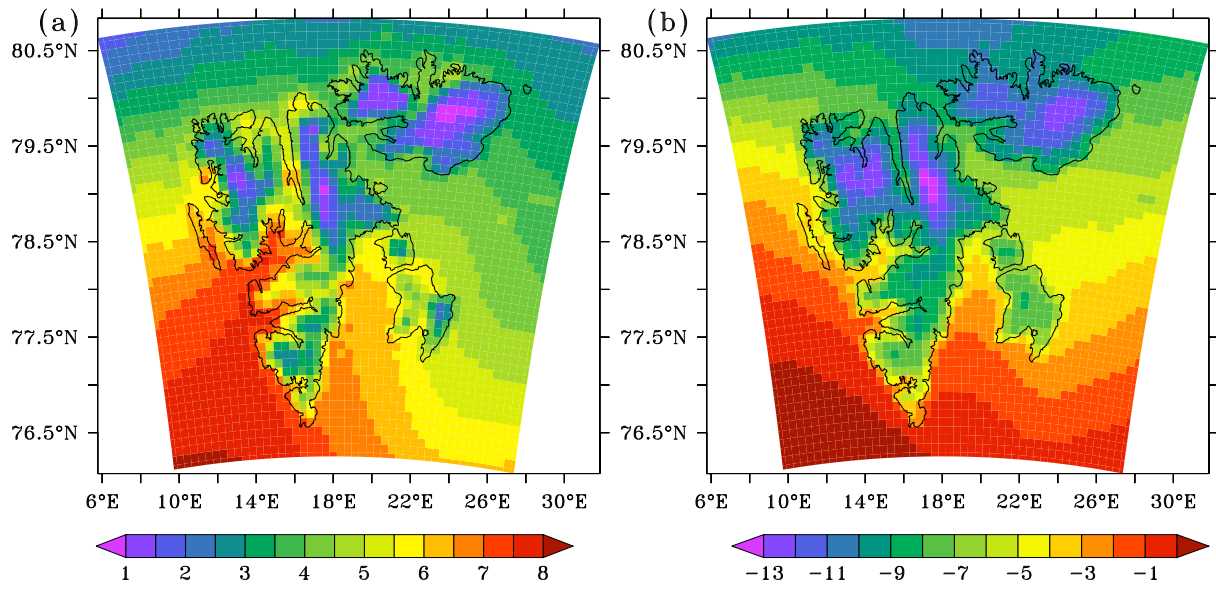

**Fig. S2:** (a) 2070 - 2099 mean summer (JJA) near-surface temperature ( $^{\circ}\text{C}$ ). (b) Same as (a) but for winter (DJF).

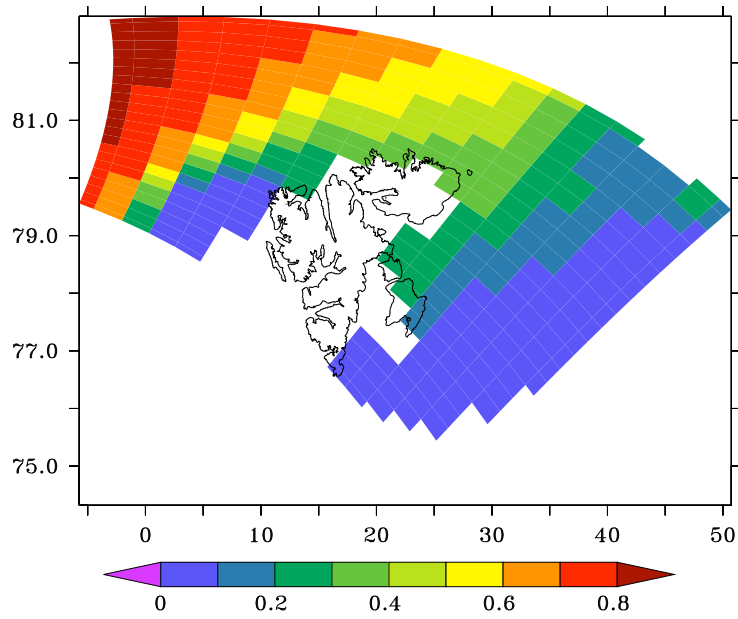

**Fig. S3:** 2070 - 2099 mean winter (DJF) sea-ice cover from MIROC5.
